# Supplementary material
Source: ML conference proceedings conference paper supplement (https://openaccess.thecvf.com/content/CVPR2026/html/Zhao_MOS_Mitigating_Optical-SAR_CVPR_2026_paper.html)
Supplement: Supplementary file 1 [file Zhao_MOS_Mitigating_Optical-SAR_CVPR_2026_supplemental.pdf]

# MOS: Mitigating Optical-SAR Modality Gap for Cross-Modal Ship Re-Identification

## Supplementary Material

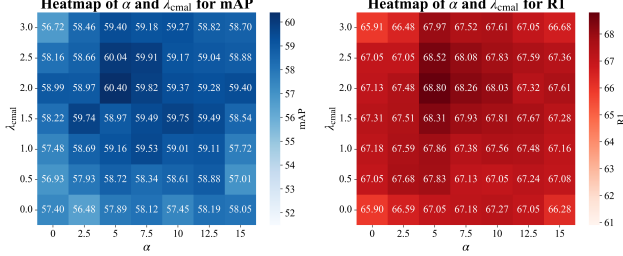

Figure 1. R1 heatmap based on  $\alpha$  and  $\lambda_{\text{cmal}}$  in *ALL to ALL* protocol.

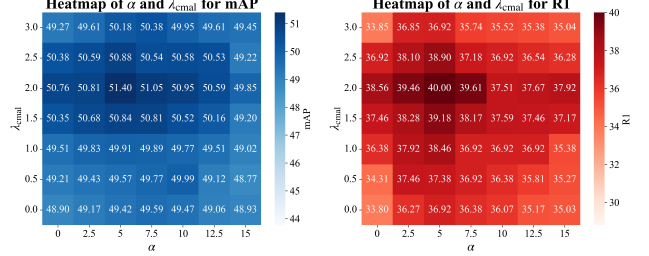

Figure 2. R1 heatmap based on  $\alpha$  and  $\lambda_{\text{cmal}}$  in *Optical to SAR* protocol.

## 1. Wasserstein-2 distance

The Wasserstein-2 distance ( $W_2$ ) is a fundamental metric from optimal transport that measures the minimal effort required to transform one probability distribution into another. For two distributions  $p$  and  $q$  defined on a metric space  $\mathcal{X}$ , the  $W_2$  distance is given by:

$$W_2(p, q) = \left( \inf_{\gamma \in \Gamma(p, q)} \mathbb{E}_{(x, y) \sim \gamma} [\|x - y\|_2^2] \right)^{1/2}, \quad (1)$$

where  $\Gamma(p, q)$  denotes the set of couplings whose marginals are  $p$  and  $q$ . The infimum corresponds to the optimal transport plan that minimizes the quadratic transportation cost.

A key advantage of  $W_2$  is that it admits a closed-form expression when both distributions are Gaussian. Let

$$p = \mathcal{N}(\mu_1, \Sigma_1), \quad q = \mathcal{N}(\mu_2, \Sigma_2),$$

then the squared Wasserstein-2 distance is:

$$W_2^2(p, q) = \|\mu_1 - \mu_2\|_2^2 + \text{Tr}(\Sigma_1 + \Sigma_2 - 2(\Sigma_1^{1/2}\Sigma_2\Sigma_1^{1/2})^{1/2}). \quad (2)$$

This formulation shows that  $W_2$  jointly aligns the means and covariances of the two distributions, providing a geometry-aware and numerically stable measurement of distributional discrepancy. Compared with KL divergence or simple  $\ell_2$  matching,  $W_2$  remains finite for distributions with disjoint support and captures covariance differences naturally. These properties make it particularly effective for aligning Gaussian feature distributions in our method.

## 2. Heatmap in other evaluation protocols

Both heatmaps in Fig. 1 and Fig. 2 illustrate the sensitivity of our method with respect to the hyper-parameters  $\alpha$

and  $\lambda_{\text{cmal}}$  under the *ALL to ALL* and *Optical to SAR* protocols. Despite the differences in evaluation settings, the two heatmaps exhibit highly consistent trends: the optimal performance is achieved when  $\alpha = 5.0$  and  $\lambda_{\text{cmal}} = 2.0$  across all protocols. This consistency indicates that our cross-modal alignment strategy is robust and not overly sensitive to the choice of  $\alpha$  and  $\lambda_{\text{cmal}}$  across different protocols.
